# Supplementary material for: Sputtering and sulfurization-combined synthesis of a transparent WS2 counter electrode and its application to dye-sensitized solar cells
Source: Royal Society of Chemistry journal article supplement (doi:10.1039/c5ra18613g), 2015-01-01
Supplement: c5ra18613g1.pdf [file c5ra18613g1.pdf]

Electronic Supplementary Information

**Sputtering and sulfurization- combined synthesis of transparent WS<sub>2</sub> counter electrode and its application to dye-sensitized solar cells**

Sajjad Hussain<sup>a,b</sup>, ShoyebMohamad F. Shaikh<sup>c,d</sup>, Dhanasekaran Vikraman<sup>a,b</sup>, Rajaram S. Mane<sup>c,e</sup>, Oh-Shim Joo<sup>c,d</sup>, Mu. Naushad,<sup>e</sup> and Jongwan Jung<sup>a,b,\*</sup>

*<sup>a</sup>Graphene Research Institute, Sejong University, Seoul 143-747, Republic of Korea*

*<sup>b</sup>Institute of Nano and Advanced Materials Engineering, Sejong University, Seoul 143-747, Republic of Korea*

*<sup>c</sup>Clean Energy Research Centre, Korea Institute of Science and Technology, Seoul, Republic of Korea*

*<sup>d</sup>School of Science, University of Science and Technology, 52 Eoeun dong, Yuseonggu, Daejeon 305-333, Republic of Korea*

*<sup>e</sup>Advanced Materials Research Chair, Department of Chemistry, College of Science, Bld-5, King Saud University, Riyadh, Saudi Arabia.*

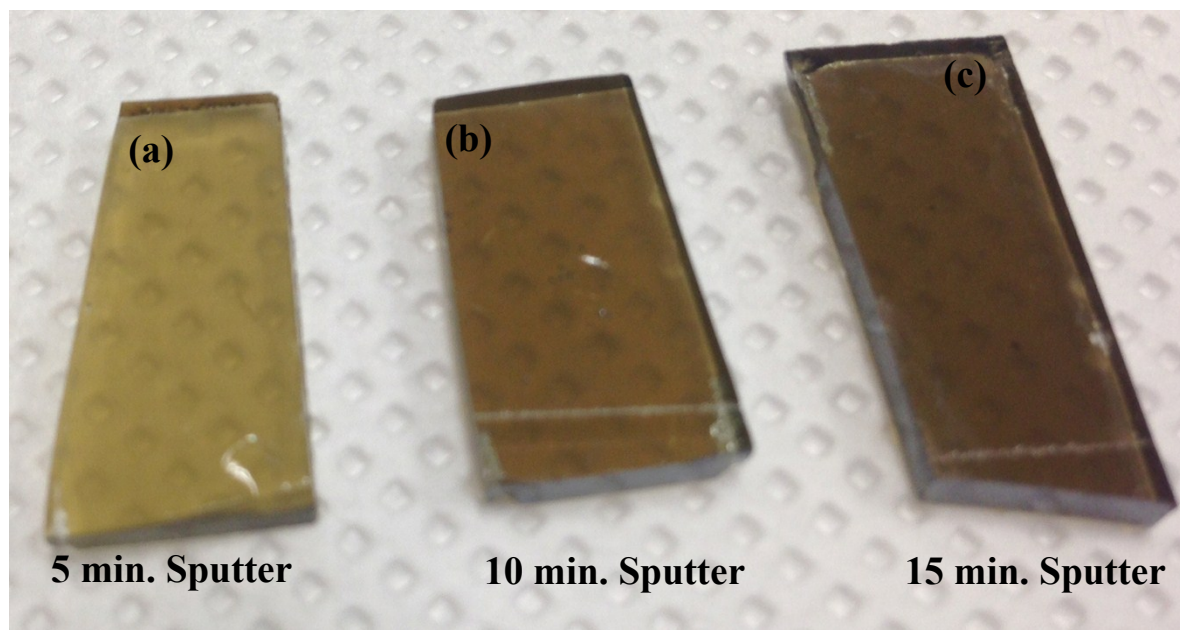

**Fig. S1** 3D photographical images for different sputtering time prepared WS<sub>2</sub> films (a) 5, (b) 10 and (c) 15 minutes

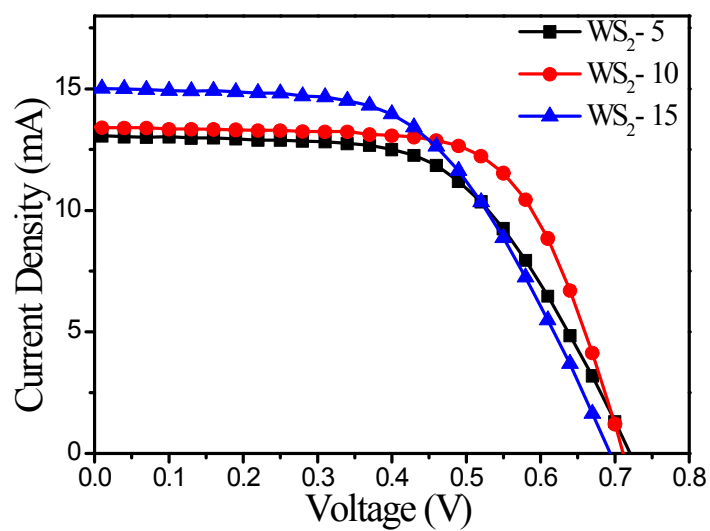

**Fig.S2** J-V characteristics plot for different sputtering time prepared WS<sub>2</sub> films as a counter electrode

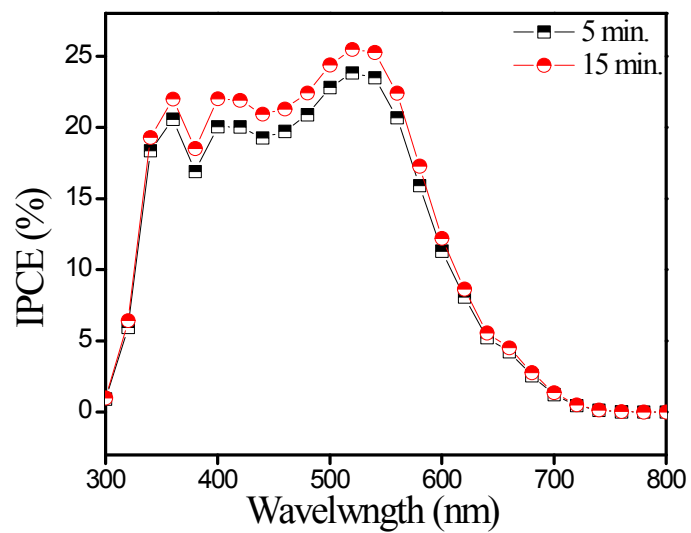

**Fig. S3.** IPCE measurement of different WS<sub>2</sub> CEs prepared at different sputtering time.

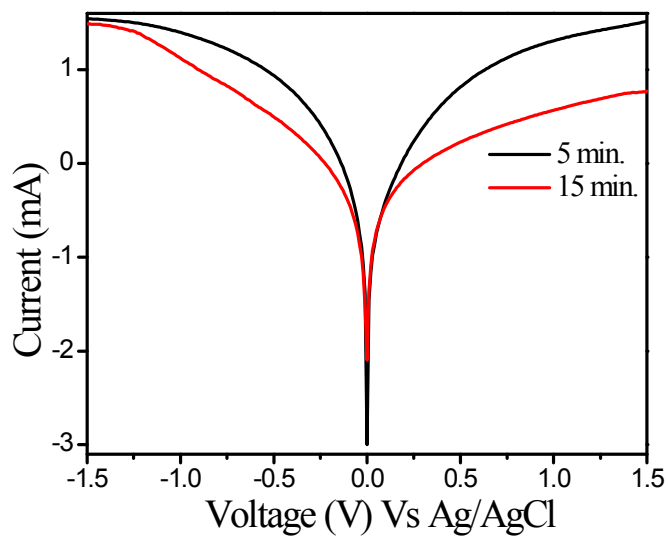

**Fig. S4.** Tafel polarization curves of symmetrical cells obtained using WS<sub>2</sub> CEs prepared at different sputtering time.

**Table-S1** DSSC cell parameter values for different combination of counter electrode

| <b>Sr. No</b> | <b>DSSCs type</b>                            | <b>J<sub>sc</sub></b> | <b>V<sub>oc</sub></b> | <b>FF</b>   | <b>η</b>   |
|---------------|----------------------------------------------|-----------------------|-----------------------|-------------|------------|
| <b>1</b>      | <b>TiO<sub>2</sub>-Pt</b>                    | <b>16.50</b>          | <b>0.66</b>           | <b>0.61</b> | <b>6.8</b> |
| 2             | TiO <sub>2</sub> -5 Min WS <sub>2</sub>      | 13.07                 | 0.72                  | 0.58        | 5.4        |
| <b>3</b>      | <b>TiO<sub>2</sub>-10 Min WS<sub>2</sub></b> | <b>13.43</b>          | <b>0.71</b>           | <b>0.66</b> | <b>6.3</b> |
| 4             | TiO <sub>2</sub> -15 Min WS <sub>2</sub>     | 15.01                 | 0.69                  | 0.55        | 5.8        |
